# Supplementary material
Source: publisher figshare collection journal article supplement (https://acs.figshare.com/ndownloader/files/5069050)
Supplement: Supplementary file 1 [file 5069050]

  
data_lb38i 
  
_audit_creation_method            SHELXL-97 
_chemical_name_systematic 
; 
 ? 
; 
_chemical_name_common             ? 
_chemical_melting_point           ? 
_chemical_formula_moiety          'C48 H76 Bi2 N8, C7 H8' 
_chemical_formula_sum 
 'C55 H84 Bi2 N8' 
_chemical_formula_weight          1275.26 
  
loop_ 
 _atom_type_symbol 
 _atom_type_description 
 _atom_type_scat_dispersion_real 
 _atom_type_scat_dispersion_imag 
 _atom_type_scat_source 
 'C'  'C'   0.0033   0.0016 
 'International Tables Vol C Tables 4.2.6.8 and 6.1.1.4' 
 'H'  'H'   0.0000   0.0000 
 'International Tables Vol C Tables 4.2.6.8 and 6.1.1.4' 
 'N'  'N'   0.0061   0.0033 
 'International Tables Vol C Tables 4.2.6.8 and 6.1.1.4' 
 'Bi'  'Bi'  -4.1077  10.2566 
 'International Tables Vol C Tables 4.2.6.8 and 6.1.1.4' 
  
_symmetry_cell_setting            Monoclinic 
_symmetry_space_group_name_H-M    'P 21/c' 
_symmetry_space_group_name_Hall   '-P 2ybc'
  
loop_ 
 _symmetry_equiv_pos_as_xyz 
 'x, y, z' 
 '-x, y+1/2, -z+1/2' 
 '-x, -y, -z' 
 'x, -y-1/2, z-1/2' 
  
_cell_length_a                    12.276(2) 
_cell_length_b                    21.942(4) 
_cell_length_c                    21.119(4) 
_cell_angle_alpha                 90.00 
_cell_angle_beta                  103.55(3) 
_cell_angle_gamma                 90.00 
_cell_volume                      5530.3(17) 
_cell_formula_units_Z             4 
_cell_measurement_temperature     173(2) 
_cell_measurement_reflns_used     75639 
_cell_measurement_theta_min       1.65 
_cell_measurement_theta_max       26.05 
  
_exptl_crystal_description        blocks 
_exptl_crystal_colour             red 
_exptl_crystal_size_max           0.50 
_exptl_crystal_size_mid           0.40 
_exptl_crystal_size_min           0.40 
_exptl_crystal_density_meas       ? 
_exptl_crystal_density_diffrn     1.532 
_exptl_crystal_density_method     'not measured' 
_exptl_crystal_F_000              2544 
_exptl_absorpt_coefficient_mu     6.397 
_exptl_absorpt_correction_type    refdelf 
_exptl_absorpt_correction_T_min   0.1422 
_exptl_absorpt_correction_T_max   0.1840 
_exptl_absorpt_process_details    'Stuart & Walker, Acta Cryst A (1983)' 
  
_exptl_special_details 
; 
 ? 
; 
  
_diffrn_ambient_temperature       173(2) 
_diffrn_radiation_wavelength      0.71073 
_diffrn_radiation_type            MoK\a 
_diffrn_radiation_source          'fine-focus sealed tube' 
_diffrn_radiation_monochromator   graphite 
_diffrn_measurement_device_type   'STOE IPDS' 
_diffrn_measurement_method        '\p scans' 
_diffrn_detector_area_resol_mean  ? 
_diffrn_standards_number          ? 
_diffrn_standards_interval_count  ? 
_diffrn_standards_interval_time   ? 
_diffrn_standards_decay_%         'random variation +/-2.0' 
_diffrn_reflns_number             74497 
_diffrn_reflns_av_R_equivalents   0.1260 
_diffrn_reflns_av_sigmaI/netI     0.0744 
_diffrn_reflns_limit_h_min        -15 
_diffrn_reflns_limit_h_max        15 
_diffrn_reflns_limit_k_min        -26 
_diffrn_reflns_limit_k_max        26 
_diffrn_reflns_limit_l_min        -25 
_diffrn_reflns_limit_l_max        25 
_diffrn_reflns_theta_min          1.94 
_diffrn_reflns_theta_max          26.06 
_reflns_number_total              10700 
_reflns_number_gt                 7353 
_reflns_threshold_expression      >2sigma(I) 
  
_computing_data_collection        'STOE Expose' 
_computing_cell_refinement        'STOE Cell' 
_computing_data_reduction         'STOE Reduce' 
_computing_structure_solution     'SHELXS-97 (Sheldrick, 1990)' 
_computing_structure_refinement   'SHELXL-97 (Sheldrick, 1997)' 
_computing_molecular_graphics     Diamond 
_computing_publication_material   'Siemens SHELXTL' 
  
_refine_special_details 
; 
 Refinement of F^2^ against ALL reflections.  The weighted R-factor wR and 
 goodness of fit S are based on F^2^, conventional R-factors R are based 
 on F, with F set to zero for negative F^2^. The threshold expression of 
 F^2^ > 2sigma(F^2^) is used only for calculating R-factors(gt) etc. and is 
 not relevant to the choice of reflections for refinement.  R-factors based 
 on F^2^ are statistically about twice as large as those based on F, and R- 
 factors based on ALL data will be even larger. 
; 
  
_refine_ls_structure_factor_coef  Fsqd 
_refine_ls_matrix_type            full 
_refine_ls_weighting_scheme       calc 
_refine_ls_weighting_details 
 'calc w=1/[\s^2^(Fo^2^)+(0.0543P)^2^+0.0000P] where P=(Fo^2^+2Fc^2^)/3' 
_atom_sites_solution_primary      direct 
_atom_sites_solution_secondary    difmap 
_atom_sites_solution_hydrogens    geom 
_refine_ls_hydrogen_treatment     refU
_refine_ls_extinction_method      none 
_refine_ls_extinction_coef        ? 
_refine_ls_number_reflns          10700 
_refine_ls_number_parameters      606 
_refine_ls_number_restraints      0 
_refine_ls_R_factor_all           0.0679 
_refine_ls_R_factor_gt            0.0384 
_refine_ls_wR_factor_ref          0.0969 
_refine_ls_wR_factor_gt           0.0889 
_refine_ls_goodness_of_fit_ref    0.909 
_refine_ls_restrained_S_all       0.909 
_refine_ls_shift/su_max           0.002 
_refine_ls_shift/su_mean          0.000 
  
loop_ 
 _atom_site_label 
 _atom_site_type_symbol 
 _atom_site_fract_x 
 _atom_site_fract_y 
 _atom_site_fract_z 
 _atom_site_U_iso_or_equiv 
 _atom_site_adp_type 
 _atom_site_occupancy 
 _atom_site_symmetry_multiplicity 
 _atom_site_calc_flag 
 _atom_site_refinement_flags 
 _atom_site_disorder_assembly 
 _atom_site_disorder_group 
Bi1 Bi 0.25208(2) 0.354797(12) 0.619805(13) 0.02676(8) Uani 1 1 d . . . 
Bi2 Bi 0.30265(2) 0.259410(12) 0.731079(13) 0.02775(8) Uani 1 1 d . . . 
C1 C 0.2418(5) 0.4469(3) 0.6725(3) 0.0279(15) Uani 1 1 d . . . 
C2 C 0.2824(5) 0.4590(3) 0.7398(3) 0.0267(15) Uani 1 1 d . . . 
C3 C 0.2712(6) 0.5168(3) 0.7652(4) 0.0324(17) Uani 1 1 d . . . 
H3 H 0.2966 0.5234 0.8107 0.043(5) Uiso 1 1 calc R . . 
C4 C 0.2242(6) 0.5645(4) 0.7259(4) 0.0397(19) Uani 1 1 d . . . 
H4 H 0.2187 0.6038 0.7437 0.043(5) Uiso 1 1 calc R . . 
C5 C 0.1855(6) 0.5538(4) 0.6603(4) 0.0377(18) Uani 1 1 d . . . 
H5 H 0.1528 0.5863 0.6326 0.043(5) Uiso 1 1 calc R . . 
C6 C 0.1931(5) 0.4959(3) 0.6334(4) 0.0308(16) Uani 1 1 d . . . 
C7 C 0.3289(6) 0.4091(3) 0.7875(3) 0.0299(16) Uani 1 1 d . . . 
H7A H 0.2664 0.3818 0.7912 0.040(5) Uiso 1 1 calc R . . 
H7B H 0.3821 0.3847 0.7692 0.040(5) Uiso 1 1 calc R . . 
C8 C 0.4961(7) 0.4536(4) 0.8533(4) 0.052(2) Uani 1 1 d . . . 
H8A H 0.5425 0.4219 0.8400 0.066(4) Uiso 1 1 calc R . . 
H8B H 0.5320 0.4677 0.8973 0.066(4) Uiso 1 1 calc R . . 
H8C H 0.4880 0.4879 0.8229 0.066(4) Uiso 1 1 calc R . . 
C9 C 0.3958(7) 0.3786(4) 0.8988(4) 0.052(2) Uani 1 1 d . . . 
H9A H 0.3210 0.3628 0.8984 0.066(4) Uiso 1 1 calc R . . 
H9B H 0.4316 0.3930 0.9427 0.066(4) Uiso 1 1 calc R . . 
H9C H 0.4414 0.3461 0.8862 0.066(4) Uiso 1 1 calc R . . 
N2 N 0.2231(6) 0.4719(3) 0.5238(3) 0.0485(18) Uani 1 1 d . . . 
C10 C 0.1442(6) 0.4907(4) 0.5606(4) 0.0359(18) Uani 1 1 d . . . 
H10A H 0.0817 0.4611 0.5531 0.040(5) Uiso 1 1 calc R . . 
H10B H 0.1127 0.5307 0.5440 0.040(5) Uiso 1 1 calc R . . 
C11 C 0.3218(7) 0.5105(5) 0.5360(5) 0.056(2) Uani 1 1 d . . . 
H11A H 0.2997 0.5525 0.5233 0.066(4) Uiso 1 1 calc R . . 
H11B H 0.3737 0.4958 0.5104 0.066(4) Uiso 1 1 calc R . . 
H11C H 0.3589 0.5093 0.5824 0.066(4) Uiso 1 1 calc R . . 
C12 C 0.1684(8) 0.4753(4) 0.4538(4) 0.058(3) Uani 1 1 d . . . 
H12A H 0.0986 0.4519 0.4452 0.066(4) Uiso 1 1 calc R . . 
H12B H 0.2186 0.4585 0.4284 0.066(4) Uiso 1 1 calc R . . 
H12C H 0.1518 0.5180 0.4415 0.066(4) Uiso 1 1 calc R . . 
C13 C 0.0608(5) 0.3408(3) 0.5907(3) 0.0269(15) Uani 1 1 d . . . 
C14 C -0.0121(5) 0.3493(3) 0.6323(3) 0.0280(15) Uani 1 1 d . . . 
C15 C -0.1284(6) 0.3424(3) 0.6065(4) 0.0343(17) Uani 1 1 d . . . 
H15 H -0.1788 0.3474 0.6341 0.043(5) Uiso 1 1 calc R . . 
C16 C -0.1693(6) 0.3284(4) 0.5419(4) 0.0378(19) Uani 1 1 d . . . 
H16 H -0.2479 0.3245 0.5251 0.043(5) Uiso 1 1 calc R . . 
C17 C -0.0974(6) 0.3201(3) 0.5010(4) 0.0366(18) Uani 1 1 d . . . 
H17 H -0.1266 0.3105 0.4564 0.043(5) Uiso 1 1 calc R . . 
C18 C 0.0182(6) 0.3258(3) 0.5255(3) 0.0303(16) Uani 1 1 d . . . 
C19 C 0.0306(6) 0.3591(4) 0.7046(4) 0.0344(17) Uani 1 1 d . . . 
H19A H 0.0446 0.3188 0.7262 0.040(5) Uiso 1 1 calc R . . 
H19B H 0.1032 0.3808 0.7123 0.040(5) Uiso 1 1 calc R . . 
C20 C -0.0194(8) 0.3839(5) 0.8042(4) 0.053(2) Uani 1 1 d . . . 
H20A H 0.0592 0.3944 0.8226 0.066(4) Uiso 1 1 calc R . . 
H20B H -0.0320 0.3409 0.8132 0.066(4) Uiso 1 1 calc R . . 
H20C H -0.0677 0.4096 0.8240 0.066(4) Uiso 1 1 calc R . . 
C21 C -0.0410(7) 0.4582(4) 0.7200(5) 0.051(2) Uani 1 1 d . . . 
H21A H -0.0942 0.4806 0.7394 0.066(4) Uiso 1 1 calc R . . 
H21B H -0.0606 0.4638 0.6727 0.066(4) Uiso 1 1 calc R . . 
H21C H 0.0349 0.4735 0.7379 0.066(4) Uiso 1 1 calc R . . 
N3 N -0.0456(5) 0.3937(3) 0.7351(3) 0.0379(16) Uani 1 1 d . . . 
C22 C 0.0946(6) 0.3164(4) 0.4796(4) 0.0353(18) Uani 1 1 d . . . 
H22A H 0.0484 0.3104 0.4349 0.040(5) Uiso 1 1 calc R . . 
H22B H 0.1405 0.3535 0.4796 0.040(5) Uiso 1 1 calc R . . 
C23 C 0.2524(8) 0.2645(5) 0.4561(4) 0.056(2) Uani 1 1 d . . . 
H23A H 0.3029 0.2295 0.4671 0.066(4) Uiso 1 1 calc R . . 
H23B H 0.2961 0.3023 0.4639 0.066(4) Uiso 1 1 calc R . . 
H23C H 0.2129 0.2623 0.4101 0.066(4) Uiso 1 1 calc R . . 
C24 C 0.1073(7) 0.2066(4) 0.4907(4) 0.050(2) Uani 1 1 d . . . 
H24A H 0.0586 0.2058 0.5214 0.066(4) Uiso 1 1 calc R . . 
H24B H 0.1601 0.1724 0.4999 0.066(4) Uiso 1 1 calc R . . 
H24C H 0.0616 0.2031 0.4461 0.066(4) Uiso 1 1 calc R . . 
N4 N 0.1692(5) 0.2637(3) 0.4977(3) 0.0391(15) Uani 1 1 d . . . 
C25 C 0.5010(5) 0.2625(3) 0.7669(3) 0.0269(15) Uani 1 1 d . . . 
C26 C 0.5438(6) 0.2222(3) 0.8180(4) 0.0358(18) Uani 1 1 d . . . 
C27 C 0.6597(6) 0.2152(4) 0.8407(4) 0.0399(19) Uani 1 1 d . . . 
H27 H 0.6880 0.1876 0.8753 0.043(5) Uiso 1 1 calc R . . 
C28 C 0.7329(6) 0.2476(4) 0.8138(4) 0.043(2) Uani 1 1 d . . . 
H28 H 0.8113 0.2417 0.8289 0.043(5) Uiso 1 1 calc R . . 
C29 C 0.6923(6) 0.2888(4) 0.7646(4) 0.0361(18) Uani 1 1 d . . . 
H29 H 0.7432 0.3112 0.7460 0.043(5) Uiso 1 1 calc R . . 
C30 C 0.5769(5) 0.2980(3) 0.7418(3) 0.0282(16) Uani 1 1 d . . . 
C31 C 0.5372(5) 0.3438(3) 0.6873(4) 0.0316(16) Uani 1 1 d . . . 
H31A H 0.4998 0.3214 0.6474 0.040(5) Uiso 1 1 calc R . . 
H31B H 0.4806 0.3707 0.6994 0.040(5) Uiso 1 1 calc R . . 
C32 C 0.6584(8) 0.4298(4) 0.7193(6) 0.071(3) Uani 1 1 d . . . 
H32A H 0.5943 0.4569 0.7177 0.066(4) Uiso 1 1 calc R . . 
H32B H 0.7202 0.4531 0.7091 0.066(4) Uiso 1 1 calc R . . 
H32C H 0.6824 0.4123 0.7631 0.066(4) Uiso 1 1 calc R . . 
C33 C 0.5894(8) 0.4072(5) 0.6072(5) 0.070(3) Uani 1 1 d . . . 
H33A H 0.5258 0.4346 0.6057 0.066(4) Uiso 1 1 calc R . . 
H33B H 0.5664 0.3741 0.5757 0.066(4) Uiso 1 1 calc R . . 
H33C H 0.6511 0.4300 0.5962 0.066(4) Uiso 1 1 calc R . . 
N5 N 0.6264(5) 0.3817(3) 0.6726(4) 0.0454(18) Uani 1 1 d . . . 
C34 C 0.4721(6) 0.1854(4) 0.8532(4) 0.0385(18) Uani 1 1 d . . . 
H34A H 0.5211 0.1668 0.8924 0.040(5) Uiso 1 1 calc R . . 
H34B H 0.4197 0.2133 0.8680 0.040(5) Uiso 1 1 calc R . . 
N6 N 0.4097(7) 0.1390(4) 0.8154(5) 0.067(2) Uani 1 1 d . . . 
C35 C 0.4806(8) 0.0965(4) 0.7886(6) 0.065(3) Uani 1 1 d . . . 
H35A H 0.5277 0.1196 0.7655 0.066(4) Uiso 1 1 calc R . . 
H35B H 0.4329 0.0683 0.7583 0.066(4) Uiso 1 1 calc R . . 
H35C H 0.5284 0.0734 0.8242 0.066(4) Uiso 1 1 calc R . . 
C36 C 0.3531(10) 0.1023(5) 0.8566(6) 0.083(4) Uani 1 1 d . . . 
H36A H 0.4087 0.0871 0.8945 0.066(4) Uiso 1 1 calc R . . 
H36B H 0.3151 0.0677 0.8314 0.066(4) Uiso 1 1 calc R . . 
H36C H 0.2980 0.1275 0.8713 0.066(4) Uiso 1 1 calc R . . 
C37 C 0.2855(5) 0.1733(3) 0.6675(3) 0.0297(16) Uani 1 1 d . . . 
C38 C 0.3506(6) 0.1590(3) 0.6240(3) 0.0322(17) Uani 1 1 d . . . 
C39 C 0.3367(7) 0.1030(4) 0.5912(4) 0.043(2) Uani 1 1 d . . . 
H39 H 0.3808 0.0938 0.5610 0.043(5) Uiso 1 1 calc R . . 
C40 C 0.2591(7) 0.0610(4) 0.6023(5) 0.055(3) Uani 1 1 d . . . 
H40 H 0.2509 0.0228 0.5806 0.043(5) Uiso 1 1 calc R . . 
C41 C 0.1928(7) 0.0755(4) 0.6460(4) 0.045(2) Uani 1 1 d . . . 
H41 H 0.1392 0.0468 0.6534 0.043(5) Uiso 1 1 calc R . . 
C42 C 0.2039(6) 0.1315(4) 0.6792(4) 0.0387(18) Uani 1 1 d . . . 
C43 C 0.4342(6) 0.2040(3) 0.6078(4) 0.0323(17) Uani 1 1 d . . . 
H43A H 0.3931 0.2327 0.5746 0.040(5) Uiso 1 1 calc R . . 
H43B H 0.4670 0.2279 0.6474 0.040(5) Uiso 1 1 calc R . . 
N7 N 0.5252(5) 0.1772(3) 0.5838(3) 0.0394(15) Uani 1 1 d . . . 
C44 C 0.5859(8) 0.2244(4) 0.5580(5) 0.054(2) Uani 1 1 d . . . 
H44A H 0.5342 0.2463 0.5230 0.066(4) Uiso 1 1 calc R . . 
H44B H 0.6456 0.2058 0.5409 0.066(4) Uiso 1 1 calc R . . 
H44C H 0.6188 0.2530 0.5929 0.066(4) Uiso 1 1 calc R . . 
C45 C 0.6030(7) 0.1463(4) 0.6371(5) 0.051(2) Uani 1 1 d . . . 
H45A H 0.6322 0.1756 0.6720 0.066(4) Uiso 1 1 calc R . . 
H45B H 0.6652 0.1291 0.6211 0.066(4) Uiso 1 1 calc R . . 
H45C H 0.5636 0.1135 0.6540 0.066(4) Uiso 1 1 calc R . . 
C46 C 0.1333(6) 0.1433(4) 0.7255(4) 0.0412(19) Uani 1 1 d . . . 
H46A H 0.0921 0.1055 0.7306 0.040(5) Uiso 1 1 calc R . . 
H46B H 0.1825 0.1533 0.7685 0.040(5) Uiso 1 1 calc R . . 
N8 N 0.0525(5) 0.1926(3) 0.7063(3) 0.0408(16) Uani 1 1 d . . . 
C47 C -0.0048(8) 0.2043(4) 0.7587(5) 0.058(3) Uani 1 1 d . . . 
H47A H 0.0491 0.2202 0.7969 0.066(4) Uiso 1 1 calc R . . 
H47B H -0.0372 0.1663 0.7702 0.066(4) Uiso 1 1 calc R . . 
H47C H -0.0645 0.2343 0.7439 0.066(4) Uiso 1 1 calc R . . 
C48 C -0.0292(7) 0.1769(4) 0.6470(5) 0.057(2) Uani 1 1 d . . . 
H48A H 0.0094 0.1681 0.6124 0.066(4) Uiso 1 1 calc R . . 
H48B H -0.0809 0.2110 0.6339 0.066(4) Uiso 1 1 calc R . . 
H48C H -0.0714 0.1408 0.6548 0.066(4) Uiso 1 1 calc R . . 
C49 C 0.8002(8) 0.0992(4) 0.4881(5) 0.055(2) Uani 1 1 d . . . 
C50 C 0.7036(7) 0.0778(4) 0.5051(4) 0.051(2) Uani 1 1 d . . . 
H50 H 0.6341 0.0977 0.4886 0.043(5) Uiso 1 1 calc R . . 
C51 C 0.7079(8) 0.0287(5) 0.5451(5) 0.061(3) Uani 1 1 d . . . 
H51 H 0.6415 0.0147 0.5562 0.043(5) Uiso 1 1 calc R . . 
C52 C 0.8086(10) -0.0009(5) 0.5697(5) 0.068(3) Uani 1 1 d . . . 
H52 H 0.8101 -0.0354 0.5971 0.043(5) Uiso 1 1 calc R . . 
C53 C 0.9033(9) 0.0180(5) 0.5556(6) 0.073(3) Uani 1 1 d . . . 
H53 H 0.9723 -0.0021 0.5734 0.043(5) Uiso 1 1 calc R . . 
C54 C 0.8992(8) 0.0686(5) 0.5136(6) 0.064(3) Uani 1 1 d . . . 
H54 H 0.9661 0.0818 0.5026 0.043(5) Uiso 1 1 calc R . . 
C55 C 0.7956(12) 0.1515(5) 0.4451(6) 0.089(4) Uani 1 1 d . . . 
H55A H 0.8278 0.1871 0.4707 0.066(4) Uiso 1 1 calc R . . 
H55B H 0.7174 0.1599 0.4232 0.066(4) Uiso 1 1 calc R . . 
H55C H 0.8385 0.1426 0.4125 0.066(4) Uiso 1 1 calc R . . 
N1 N 0.3863(5) 0.4287(3) 0.8531(3) 0.0366(15) Uani 1 1 d . . . 
  
loop_ 
 _atom_site_aniso_label 
 _atom_site_aniso_U_11 
 _atom_site_aniso_U_22 
 _atom_site_aniso_U_33 
 _atom_site_aniso_U_23 
 _atom_site_aniso_U_13 
 _atom_site_aniso_U_12 
Bi1 0.02023(13) 0.03263(15) 0.02706(14) -0.00193(11) 0.00481(10) 0.00157(10) 
Bi2 0.02280(13) 0.03155(15) 0.02956(15) -0.00151(12) 0.00745(10) -0.00195(11) 
C1 0.022(3) 0.032(4) 0.030(4) 0.003(3) 0.008(3) -0.002(3) 
C2 0.023(3) 0.023(4) 0.034(4) 0.000(3) 0.005(3) -0.005(3) 
C3 0.032(4) 0.029(4) 0.033(4) -0.008(3) 0.002(3) -0.002(3) 
C4 0.042(4) 0.033(4) 0.044(5) -0.004(4) 0.009(4) 0.002(3) 
C5 0.036(4) 0.035(4) 0.042(5) 0.010(4) 0.008(3) 0.001(3) 
C6 0.022(3) 0.037(4) 0.035(4) 0.001(3) 0.010(3) -0.005(3) 
C7 0.030(4) 0.036(4) 0.022(4) -0.001(3) 0.001(3) -0.007(3) 
C8 0.040(5) 0.053(5) 0.051(5) 0.003(4) -0.012(4) -0.015(4) 
C9 0.049(5) 0.055(6) 0.043(5) 0.010(4) -0.005(4) -0.005(4) 
N2 0.065(5) 0.046(4) 0.035(4) 0.008(3) 0.013(3) 0.023(4) 
C10 0.041(4) 0.034(4) 0.030(4) 0.004(3) 0.003(3) 0.003(3) 
C11 0.045(5) 0.076(7) 0.051(6) 0.016(5) 0.016(4) 0.016(5) 
C12 0.081(7) 0.059(6) 0.034(5) 0.004(4) 0.014(5) 0.025(5) 
C13 0.016(3) 0.025(4) 0.037(4) 0.003(3) 0.001(3) 0.001(3) 
C14 0.025(3) 0.028(4) 0.028(4) 0.002(3) 0.001(3) 0.003(3) 
C15 0.021(3) 0.035(4) 0.045(5) -0.003(4) 0.005(3) 0.003(3) 
C16 0.023(4) 0.043(5) 0.039(5) 0.003(4) -0.010(3) 0.003(3) 
C17 0.039(4) 0.034(4) 0.031(4) -0.001(3) -0.004(3) 0.004(3) 
C18 0.031(4) 0.031(4) 0.025(4) 0.002(3) -0.001(3) 0.004(3) 
C19 0.026(4) 0.045(5) 0.033(4) -0.001(4) 0.008(3) 0.001(3) 
C20 0.055(5) 0.067(6) 0.041(5) -0.009(5) 0.020(4) -0.007(5) 
C21 0.042(5) 0.056(6) 0.051(5) -0.003(4) 0.003(4) 0.006(4) 
N3 0.023(3) 0.056(4) 0.035(4) -0.009(3) 0.007(3) -0.002(3) 
C22 0.036(4) 0.042(5) 0.025(4) 0.005(3) 0.002(3) -0.004(3) 
C23 0.053(5) 0.077(7) 0.044(5) -0.011(5) 0.019(4) 0.005(5) 
C24 0.052(5) 0.049(5) 0.047(5) -0.002(4) 0.008(4) 0.006(4) 
N4 0.042(4) 0.040(4) 0.036(4) -0.012(3) 0.010(3) 0.001(3) 
C25 0.024(3) 0.026(3) 0.029(4) -0.002(3) 0.004(3) 0.004(3) 
C26 0.033(4) 0.036(4) 0.037(4) -0.001(3) 0.006(3) 0.001(3) 
C27 0.040(4) 0.042(5) 0.035(5) 0.009(4) 0.003(4) 0.009(4) 
C28 0.024(4) 0.056(5) 0.044(5) 0.006(4) -0.003(3) 0.006(4) 
C29 0.025(4) 0.041(4) 0.042(5) 0.000(4) 0.007(3) -0.003(3) 
C30 0.025(3) 0.030(4) 0.029(4) -0.002(3) 0.007(3) 0.000(3) 
C31 0.022(3) 0.029(4) 0.047(5) 0.003(3) 0.014(3) -0.002(3) 
C32 0.046(5) 0.052(6) 0.114(10) -0.001(6) 0.015(6) -0.015(5) 
C33 0.061(6) 0.071(7) 0.091(8) 0.043(6) 0.045(6) 0.019(5) 
N5 0.033(4) 0.041(4) 0.066(5) 0.020(4) 0.019(3) 0.005(3) 
C34 0.040(4) 0.041(5) 0.035(4) 0.002(4) 0.008(3) 0.001(4) 
N6 0.068(5) 0.065(6) 0.077(6) 0.011(5) 0.034(5) -0.007(4) 
C35 0.068(6) 0.050(6) 0.089(8) -0.022(5) 0.041(6) -0.011(5) 
C36 0.099(9) 0.069(8) 0.101(10) 0.001(7) 0.061(8) -0.013(6) 
C37 0.028(4) 0.026(4) 0.032(4) 0.003(3) 0.001(3) 0.004(3) 
C38 0.031(4) 0.034(4) 0.027(4) 0.000(3) -0.002(3) 0.006(3) 
C39 0.038(4) 0.041(5) 0.050(5) -0.003(4) 0.009(4) 0.006(4) 
C40 0.061(6) 0.029(5) 0.073(7) -0.019(4) 0.009(5) -0.002(4) 
C41 0.038(4) 0.028(4) 0.068(6) -0.002(4) 0.010(4) -0.005(3) 
C42 0.035(4) 0.033(4) 0.046(5) 0.005(4) 0.007(4) -0.001(3) 
C43 0.027(4) 0.035(4) 0.035(4) 0.005(3) 0.006(3) 0.004(3) 
N7 0.043(4) 0.039(4) 0.041(4) 0.000(3) 0.020(3) 0.003(3) 
C44 0.051(5) 0.056(6) 0.067(7) 0.006(5) 0.034(5) 0.007(4) 
C45 0.047(5) 0.050(5) 0.058(6) 0.005(5) 0.015(4) 0.013(4) 
C46 0.034(4) 0.041(5) 0.051(5) 0.000(4) 0.015(4) -0.007(3) 
N8 0.033(3) 0.040(4) 0.052(4) -0.004(3) 0.016(3) -0.005(3) 
C47 0.055(6) 0.055(6) 0.077(7) -0.009(5) 0.041(5) -0.014(5) 
C48 0.037(5) 0.059(6) 0.071(7) -0.001(5) 0.007(4) 0.003(4) 
C49 0.072(6) 0.041(5) 0.050(6) -0.015(4) 0.014(5) -0.011(5) 
C50 0.046(5) 0.058(6) 0.049(6) -0.011(5) 0.011(4) -0.002(4) 
C51 0.059(6) 0.067(7) 0.059(6) -0.001(5) 0.019(5) 0.002(5) 
C52 0.086(8) 0.061(7) 0.049(6) 0.003(5) 0.002(6) -0.001(6) 
C53 0.060(7) 0.073(8) 0.078(8) -0.020(6) -0.002(6) -0.001(6) 
C54 0.038(5) 0.062(7) 0.094(8) -0.027(6) 0.021(5) -0.011(5) 
C55 0.123(11) 0.076(8) 0.072(8) -0.004(7) 0.030(7) -0.030(7) 
N1 0.042(4) 0.038(4) 0.026(3) -0.001(3) 0.000(3) -0.008(3) 
  
_geom_special_details 
; 
 All esds (except the esd in the dihedral angle between two l.s. planes) 
 are estimated using the full covariance matrix.  The cell esds are taken 
 into account individually in the estimation of esds in distances, angles 
 and torsion angles; correlations between esds in cell parameters are only 
 used when they are defined by crystal symmetry.  An approximate (isotropic) 
 treatment of cell esds is used for estimating esds involving l.s. planes. 
; 
  
loop_ 
 _geom_bond_atom_site_label_1 
 _geom_bond_atom_site_label_2 
 _geom_bond_distance 
 _geom_bond_site_symmetry_2 
 _geom_bond_publ_flag 
Bi1 C13 2.304(6) . ? 
Bi1 C1 2.324(7) . ? 
Bi1 Bi2 3.0992(6) . ? 
Bi2 C37 2.298(7) . ? 
Bi2 C25 2.375(6) . ? 
C1 C6 1.402(10) . ? 
C1 C2 1.418(10) . ? 
C2 C3 1.397(10) . ? 
C2 C7 1.505(9) . ? 
C3 C4 1.374(10) . ? 
C4 C5 1.376(11) . ? 
C5 C6 1.402(11) . ? 
C6 C10 1.518(10) . ? 
C7 N1 1.464(9) . ? 
C8 N1 1.454(10) . ? 
C9 N1 1.451(10) . ? 
N2 C10 1.437(10) . ? 
N2 C11 1.452(11) . ? 
N2 C12 1.475(10) . ? 
C13 C18 1.394(10) . ? 
C13 C14 1.406(10) . ? 
C14 C15 1.411(9) . ? 
C14 C19 1.509(10) . ? 
C15 C16 1.373(11) . ? 
C16 C17 1.385(11) . ? 
C17 C18 1.397(10) . ? 
C18 C22 1.512(10) . ? 
C19 N3 1.466(9) . ? 
C20 N3 1.436(10) . ? 
C21 N3 1.453(11) . ? 
C22 N4 1.469(10) . ? 
C23 N4 1.495(10) . ? 
C24 N4 1.455(11) . ? 
C25 C26 1.399(10) . ? 
C25 C30 1.409(10) . ? 
C26 C27 1.399(10) . ? 
C26 C34 1.513(11) . ? 
C27 C28 1.370(11) . ? 
C28 C29 1.379(11) . ? 
C29 C30 1.400(9) . ? 
C30 C31 1.518(10) . ? 
C31 N5 1.466(9) . ? 
C32 N5 1.437(12) . ? 
C33 N5 1.461(12) . ? 
C34 N6 1.405(11) . ? 
N6 C36 1.474(12) . ? 
N6 C35 1.476(12) . ? 
C37 C38 1.387(10) . ? 
C37 C42 1.423(10) . ? 
C38 C39 1.402(11) . ? 
C38 C43 1.518(10) . ? 
C39 C40 1.385(12) . ? 
C40 C41 1.403(12) . ? 
C41 C42 1.406(11) . ? 
C42 C46 1.473(11) . ? 
C43 N7 1.456(9) . ? 
N7 C44 1.454(10) . ? 
N7 C45 1.461(10) . ? 
C46 N8 1.459(10) . ? 
N8 C48 1.451(11) . ? 
N8 C47 1.466(11) . ? 
C49 C54 1.384(13) . ? 
C49 C50 1.399(13) . ? 
C49 C55 1.455(14) . ? 
C50 C51 1.362(13) . ? 
C51 C52 1.385(14) . ? 
C52 C53 1.334(15) . ? 
C53 C54 1.413(15) . ? 
  
loop_ 
 _geom_angle_atom_site_label_1 
 _geom_angle_atom_site_label_2 
 _geom_angle_atom_site_label_3 
 _geom_angle 
 _geom_angle_site_symmetry_1 
 _geom_angle_site_symmetry_3 
 _geom_angle_publ_flag 
C13 Bi1 C1 94.4(2) . . ? 
C13 Bi1 Bi2 97.06(17) . . ? 
C1 Bi1 Bi2 104.34(17) . . ? 
C37 Bi2 C25 99.0(2) . . ? 
C37 Bi2 Bi1 97.88(17) . . ? 
C25 Bi2 Bi1 103.31(17) . . ? 
C6 C1 C2 116.6(6) . . ? 
C6 C1 Bi1 116.7(5) . . ? 
C2 C1 Bi1 126.7(5) . . ? 
C3 C2 C1 120.7(6) . . ? 
C3 C2 C7 117.4(6) . . ? 
C1 C2 C7 121.6(6) . . ? 
C4 C3 C2 121.7(7) . . ? 
C3 C4 C5 118.4(7) . . ? 
C4 C5 C6 121.5(7) . . ? 
C1 C6 C5 121.1(7) . . ? 
C1 C6 C10 123.4(7) . . ? 
C5 C6 C10 115.5(6) . . ? 
N1 C7 C2 116.2(6) . . ? 
C10 N2 C11 112.2(7) . . ? 
C10 N2 C12 108.7(7) . . ? 
C11 N2 C12 108.2(7) . . ? 
N2 C10 C6 114.4(6) . . ? 
C18 C13 C14 120.2(6) . . ? 
C18 C13 Bi1 114.7(5) . . ? 
C14 C13 Bi1 125.0(5) . . ? 
C13 C14 C15 118.6(6) . . ? 
C13 C14 C19 122.0(6) . . ? 
C15 C14 C19 119.1(6) . . ? 
C16 C15 C14 120.6(7) . . ? 
C15 C16 C17 120.7(7) . . ? 
C16 C17 C18 119.9(7) . . ? 
C13 C18 C17 120.0(7) . . ? 
C13 C18 C22 121.3(6) . . ? 
C17 C18 C22 118.7(6) . . ? 
N3 C19 C14 114.3(6) . . ? 
C20 N3 C21 111.0(7) . . ? 
C20 N3 C19 110.7(6) . . ? 
C21 N3 C19 110.3(6) . . ? 
N4 C22 C18 112.6(6) . . ? 
C24 N4 C22 111.9(6) . . ? 
C24 N4 C23 111.3(7) . . ? 
C22 N4 C23 108.0(7) . . ? 
C26 C25 C30 118.5(6) . . ? 
C26 C25 Bi2 113.5(5) . . ? 
C30 C25 Bi2 127.9(5) . . ? 
C25 C26 C27 120.2(7) . . ? 
C25 C26 C34 124.1(7) . . ? 
C27 C26 C34 115.8(7) . . ? 
C28 C27 C26 120.9(7) . . ? 
C27 C28 C29 119.8(7) . . ? 
C28 C29 C30 120.8(7) . . ? 
C29 C30 C25 119.7(6) . . ? 
C29 C30 C31 118.4(6) . . ? 
C25 C30 C31 121.8(6) . . ? 
N5 C31 C30 114.4(6) . . ? 
C32 N5 C33 110.0(8) . . ? 
C32 N5 C31 111.6(7) . . ? 
C33 N5 C31 109.7(7) . . ? 
N6 C34 C26 114.2(7) . . ? 
C34 N6 C36 109.3(9) . . ? 
C34 N6 C35 112.6(8) . . ? 
C36 N6 C35 106.4(8) . . ? 
C38 C37 C42 120.5(7) . . ? 
C38 C37 Bi2 125.8(5) . . ? 
C42 C37 Bi2 113.6(5) . . ? 
C37 C38 C39 120.2(7) . . ? 
C37 C38 C43 121.8(6) . . ? 
C39 C38 C43 117.9(7) . . ? 
C40 C39 C38 120.6(8) . . ? 
C39 C40 C41 119.3(8) . . ? 
C40 C41 C42 121.5(7) . . ? 
C41 C42 C37 117.8(7) . . ? 
C41 C42 C46 118.8(7) . . ? 
C37 C42 C46 123.4(7) . . ? 
N7 C43 C38 115.5(6) . . ? 
C44 N7 C43 110.2(6) . . ? 
C44 N7 C45 108.7(7) . . ? 
C43 N7 C45 109.5(6) . . ? 
N8 C46 C42 114.4(7) . . ? 
C48 N8 C46 110.5(7) . . ? 
C48 N8 C47 109.6(7) . . ? 
C46 N8 C47 109.6(7) . . ? 
C54 C49 C50 117.2(9) . . ? 
C54 C49 C55 121.9(10) . . ? 
C50 C49 C55 121.0(10) . . ? 
C51 C50 C49 120.9(9) . . ? 
C50 C51 C52 120.3(10) . . ? 
C53 C52 C51 121.3(11) . . ? 
C52 C53 C54 118.7(10) . . ? 
C49 C54 C53 121.7(9) . . ? 
C9 N1 C8 110.6(6) . . ? 
C9 N1 C7 110.7(6) . . ? 
C8 N1 C7 110.8(6) . . ? 
  
loop_ 
 _geom_torsion_atom_site_label_1 
 _geom_torsion_atom_site_label_2 
 _geom_torsion_atom_site_label_3 
 _geom_torsion_atom_site_label_4 
 _geom_torsion 
 _geom_torsion_site_symmetry_1 
 _geom_torsion_site_symmetry_2 
 _geom_torsion_site_symmetry_3 
 _geom_torsion_site_symmetry_4 
 _geom_torsion_publ_flag 
C13 Bi1 Bi2 C37 76.5(2) . . . . ? 
C1 Bi1 Bi2 C37 172.9(2) . . . . ? 
C13 Bi1 Bi2 C25 177.7(2) . . . . ? 
C1 Bi1 Bi2 C25 -85.9(2) . . . . ? 
C13 Bi1 C1 C6 -66.4(5) . . . . ? 
Bi2 Bi1 C1 C6 -164.9(4) . . . . ? 
C13 Bi1 C1 C2 115.4(6) . . . . ? 
Bi2 Bi1 C1 C2 17.0(6) . . . . ? 
C6 C1 C2 C3 1.5(10) . . . . ? 
Bi1 C1 C2 C3 179.7(5) . . . . ? 
C6 C1 C2 C7 175.6(6) . . . . ? 
Bi1 C1 C2 C7 -6.3(9) . . . . ? 
C1 C2 C3 C4 -2.3(11) . . . . ? 
C7 C2 C3 C4 -176.6(7) . . . . ? 
C2 C3 C4 C5 1.5(11) . . . . ? 
C3 C4 C5 C6 0.0(11) . . . . ? 
C2 C1 C6 C5 -0.1(10) . . . . ? 
Bi1 C1 C6 C5 -178.4(5) . . . . ? 
C2 C1 C6 C10 -179.2(6) . . . . ? 
Bi1 C1 C6 C10 2.5(9) . . . . ? 
C4 C5 C6 C1 -0.7(11) . . . . ? 
C4 C5 C6 C10 178.5(7) . . . . ? 
C3 C2 C7 N1 -16.3(9) . . . . ? 
C1 C2 C7 N1 169.4(6) . . . . ? 
C11 N2 C10 C6 -54.1(9) . . . . ? 
C12 N2 C10 C6 -173.7(7) . . . . ? 
C1 C6 C10 N2 -60.2(9) . . . . ? 
C5 C6 C10 N2 120.6(7) . . . . ? 
C1 Bi1 C13 C18 131.2(5) . . . . ? 
Bi2 Bi1 C13 C18 -123.7(5) . . . . ? 
C1 Bi1 C13 C14 -45.5(6) . . . . ? 
Bi2 Bi1 C13 C14 59.6(6) . . . . ? 
C18 C13 C14 C15 -0.1(10) . . . . ? 
Bi1 C13 C14 C15 176.4(5) . . . . ? 
C18 C13 C14 C19 173.5(7) . . . . ? 
Bi1 C13 C14 C19 -10.0(9) . . . . ? 
C13 C14 C15 C16 -0.9(11) . . . . ? 
C19 C14 C15 C16 -174.6(7) . . . . ? 
C14 C15 C16 C17 0.9(12) . . . . ? 
C15 C16 C17 C18 0.0(12) . . . . ? 
C14 C13 C18 C17 1.0(10) . . . . ? 
Bi1 C13 C18 C17 -175.8(5) . . . . ? 
C14 C13 C18 C22 -180.0(6) . . . . ? 
Bi1 C13 C18 C22 3.1(9) . . . . ? 
C16 C17 C18 C13 -1.0(11) . . . . ? 
C16 C17 C18 C22 180.0(7) . . . . ? 
C13 C14 C19 N3 153.2(7) . . . . ? 
C15 C14 C19 N3 -33.2(10) . . . . ? 
C14 C19 N3 C20 160.5(7) . . . . ? 
C14 C19 N3 C21 -76.2(8) . . . . ? 
C13 C18 C22 N4 64.7(9) . . . . ? 
C17 C18 C22 N4 -116.3(7) . . . . ? 
C18 C22 N4 C24 66.0(8) . . . . ? 
C18 C22 N4 C23 -171.2(6) . . . . ? 
C37 Bi2 C25 C26 -79.6(5) . . . . ? 
Bi1 Bi2 C25 C26 -179.9(5) . . . . ? 
C37 Bi2 C25 C30 98.7(6) . . . . ? 
Bi1 Bi2 C25 C30 -1.7(6) . . . . ? 
C30 C25 C26 C27 -3.7(11) . . . . ? 
Bi2 C25 C26 C27 174.7(6) . . . . ? 
C30 C25 C26 C34 174.6(7) . . . . ? 
Bi2 C25 C26 C34 -7.0(9) . . . . ? 
C25 C26 C27 C28 0.3(12) . . . . ? 
C34 C26 C27 C28 -178.1(8) . . . . ? 
C26 C27 C28 C29 1.6(13) . . . . ? 
C27 C28 C29 C30 0.0(13) . . . . ? 
C28 C29 C30 C25 -3.5(11) . . . . ? 
C28 C29 C30 C31 -179.7(7) . . . . ? 
C26 C25 C30 C29 5.2(10) . . . . ? 
Bi2 C25 C30 C29 -172.9(5) . . . . ? 
C26 C25 C30 C31 -178.7(7) . . . . ? 
Bi2 C25 C30 C31 3.1(10) . . . . ? 
C29 C30 C31 N5 -10.6(10) . . . . ? 
C25 C30 C31 N5 173.2(7) . . . . ? 
C30 C31 N5 C32 -78.1(8) . . . . ? 
C30 C31 N5 C33 159.7(7) . . . . ? 
C25 C26 C34 N6 69.3(10) . . . . ? 
C27 C26 C34 N6 -112.3(8) . . . . ? 
C26 C34 N6 C36 173.9(8) . . . . ? 
C26 C34 N6 C35 55.9(10) . . . . ? 
C25 Bi2 C37 C38 -43.5(6) . . . . ? 
Bi1 Bi2 C37 C38 61.4(6) . . . . ? 
C25 Bi2 C37 C42 132.5(5) . . . . ? 
Bi1 Bi2 C37 C42 -122.6(5) . . . . ? 
C42 C37 C38 C39 0.0(10) . . . . ? 
Bi2 C37 C38 C39 175.7(5) . . . . ? 
C42 C37 C38 C43 176.8(6) . . . . ? 
Bi2 C37 C38 C43 -7.5(9) . . . . ? 
C37 C38 C39 C40 -1.0(11) . . . . ? 
C43 C38 C39 C40 -177.9(7) . . . . ? 
C38 C39 C40 C41 1.2(13) . . . . ? 
C39 C40 C41 C42 -0.5(13) . . . . ? 
C40 C41 C42 C37 -0.4(12) . . . . ? 
C40 C41 C42 C46 -178.7(8) . . . . ? 
C38 C37 C42 C41 0.7(11) . . . . ? 
Bi2 C37 C42 C41 -175.6(6) . . . . ? 
C38 C37 C42 C46 178.9(7) . . . . ? 
Bi2 C37 C42 C46 2.7(9) . . . . ? 
C37 C38 C43 N7 156.6(7) . . . . ? 
C39 C38 C43 N7 -26.5(9) . . . . ? 
C38 C43 N7 C44 168.8(7) . . . . ? 
C38 C43 N7 C45 -71.8(8) . . . . ? 
C41 C42 C46 N8 -114.5(8) . . . . ? 
C37 C42 C46 N8 67.3(10) . . . . ? 
C42 C46 N8 C48 64.8(9) . . . . ? 
C42 C46 N8 C47 -174.3(7) . . . . ? 
C54 C49 C50 C51 0.0(13) . . . . ? 
C55 C49 C50 C51 179.7(9) . . . . ? 
C49 C50 C51 C52 0.0(14) . . . . ? 
C50 C51 C52 C53 0.7(16) . . . . ? 
C51 C52 C53 C54 -1.3(16) . . . . ? 
C50 C49 C54 C53 -0.6(14) . . . . ? 
C55 C49 C54 C53 179.7(10) . . . . ? 
C52 C53 C54 C49 1.3(16) . . . . ? 
C2 C7 N1 C9 162.2(7) . . . . ? 
C2 C7 N1 C8 -74.7(8) . . . . ? 
  
_diffrn_measured_fraction_theta_max    0.979 
_diffrn_reflns_theta_full              26.06 
_diffrn_measured_fraction_theta_full   0.979 
_refine_diff_density_max    2.085 
_refine_diff_density_min   -1.163 
_refine_diff_density_rms    0.190 
